# Supplementary material for: Lipase‐Catalyzed Synthesis of Cetyl Palmitate in the Presence of n‐Hexane and Ethyl Ether
Source: Hindawi journal article supplement (doi:10.1155/2024/4796291), 2024-01-01
Supplement: f1 [file 4796291.f1.docx]

**Supplementary Materials**

The reaction rate presented in Equation 4

(4)

together with the lumped constants (n1, n2, d1, d2, …., d8) definition in terms of elementary reaction constants (presented in Equations 2 and 3)

E (2)

(3)

were obtained by submitting the following input

[reaction]

PA + CA <==> H2O + CP

[mechanism]

E + PA <==> EPA

EPA <==> EXH2O

EXH2O <==> EX + H2O

EX + CA <==> EXCA

EXCA <==> ECP

ECP <==> E + CP

[end]

on the website <http://www.biokin.com/tools/king-altman/submit.html>.

Relating to Equations. 2 and 3, the above inputs parameters mean:

EPA = E·PA;

EXH2O = E’·H2O;

EX = E’;

EXCA = E’·CA;

ECP = E·PA

The result obtained direct from the online tool is presented below:


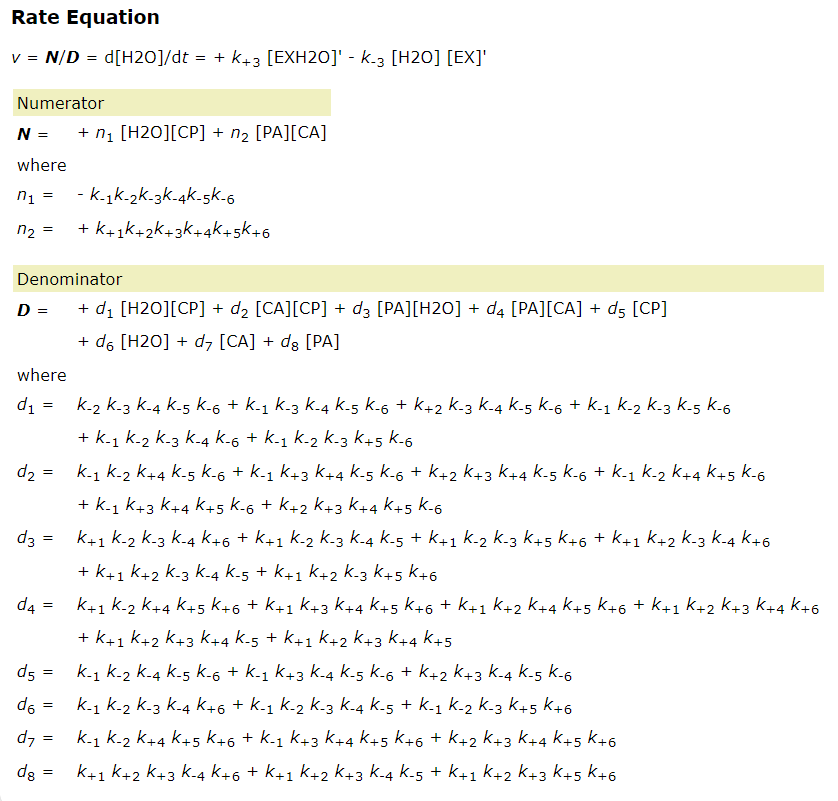


The result above is for *d[H2O]/dt*, what is equal to *-d[PA]/dt*, which was the reaction rate presented on Equations 4.
